# Supplementary material for: Diastereoselective titanium-mediated construction of cis-2,3-ring annelated 1-(2′-chloroethyl)cyclopropanols
Source: Royal Society of Chemistry journal article supplement (doi:10.1039/b211642a), 2003-01-01
Supplement: b211642a.doc [file b211642a.doc]

# Supplementary Material (ESI) for Chemical Communications

This journal is © The Royal Society of Chemistry 2003

Diastereoselective Titanium-mediated Construction of Cis-2,3-Ring annelated

1-(2'-Chloroethyl)cyclopropanols.

Frédéric Lecornué and Jean Ollivier*

*Laboratoire des Carbocycles, UMR 8615, Institut de Chimie Moléculaire et des Matériaux d'Orsay*

*Bât. 420, Université de Paris-Sud, 91405 ORSAY (France)*

# Exo 3b: (1R,4S,5r)-5-(2-chloroethyl)bicyclo[2.1.0]pentan-5-ol

1H NMR (CDCl3, 250 MHz):  3.77 ( 2H, t, *J* = 7.3 Hz), 2.36 (1H, s), 2.16-2.05 (2H, m), 1.88 (2H, t, *J* = 7.3 Hz), 1.71-1.54 (4H, m).

13C NMR (CDCl3, 63 MHz):  61.03 , 41.95 , 39.55 , 26.75 , 17.37.

IR(cm-1): 3350, 3025, 2941, 2864, 1451, 1248, 916, 731.

MS (EI) m/z: 148 (0.7) (M+), 146 (2.1) (M+), 128 (6.1), 97 (34.8), 91 (33), 83 (100), 79 (96.5), 77 (43.5), 63 (15.7), 55 (57.4), 53 (14.8), 41 (18.3), 39 (31.3).

HRMS: found: 146.0488, C7H11ClO requires 146.0498.

# Exo 3c: (1R,5S,6r)-6-(2-chloroethyl)bicyclo[3.1.0]hexan-6-ol

1H NMR (CDCl3, 250 MHz):  3.8 (2H, t, *J* = 7.3 Hz), 2.01 (2H, t, *J* = 7.3 Hz), 1.92-1.32 (6H, m), 1.23 (2H, m).

13C NMR (CDCl3, 63 MHz):  60.09, 41.88, 33.28, 32.15, 26.18, 25.91.

MS (EI) m/z :162 (1.82) (M+), 160 (5.45) (M+), 119 (10.91), 79 (14.54), 69 (99), 67 (37.27), 63 (19.1), 55 (57.3), 43 (18.2), 41 (86.4), 39 (40).

IR (cm-1): 3345, 2955, 2868, 1453, 688.

HRMS: found: 160.0656, C8H13ClO requires160.0654.

# Endo 3c: (1R,5S,6s)-6-(2-chloroethyl)bicyclo[3.1.0]hexan-6-ol

1H NMR (CDCl3, 250 MHz):  3.75 (2H, t, *J* = 7.3 Hz), 1.97 (2H, t, *J* = 7.3 Hz), 1.9-1.5 (6H, m), 1.28 (2H, m).

13C NMR (CDCl3, 63 MHz):  61.15, 42.01, 41.78, 30.07, 26.18, 25.45.

IR (cm-1): 3405, 2938, 2866, 1450, 1249, 684.

MS m/z 162 (2.2) (M+), 160 (6.6) (M+), 119 (8.3), 97 (98.3), 79 (16.6), 69 (100), 67 (42.2), 63 (21.1), 55 (63.3), 43 (16.6), 41 (72.8), 39 (38.9).

HRMS: found: 160.0650, C8H13ClO requires160.0654.

**Exo****3d: (1R,6S,7r)-7-(2-chloroethyl)bicyclo[4.1.0]heptan-7-ol**

1H NMR (CDCl3, 250 MHz):  3.81 (2H,t, *J* = 7.4 Hz), 2.14 (2H,s, *J* = 7.4 Hz), 1.86 (3H, m), 1.65 (1H s), 1.42 (2H, m), 1.16 (6H, m).

13C NMR (CDCl3, 63 MHz):  58.85, 41.64, 37.78, 21.2, 20.80, 18.44 .

IR(cm-1): 3585, 2934, 2857, 1450, 1200.

MS (EI) m/z: 176 (2.9) (M+), 174 ( 8.5), (M+) 145 (12.2), 111 (100), 93 (15.5), 83 (18.1), 67 (39.9), 55 (18).

HRMS: found: 174.0809, C9H15ClO requires 174.0811.

**Exo** **3e: (1R,7S,8r)-8-(2-chloroethyl)bicyclo[5.1.0]octan-8-ol**

1H NMR (CDCl3 250 MHz):  3.74 (2H,t, *J* = 7.5 Hz); 2.14 (2H, t, *J* = 7.5 Hz), 2.09-2.02 (2H, m), 1.92-1.78 (4H, m); 1.38-0.78 (7H, m).

13C NMR (CDCl3, 63 MHz):  61.82, 41.91, 34.11, 32.77, 29.85, 29.78, 26.29.

IR(cm-1): 3278, 2918, 2851, 1461, 1230, 1190, 1096.

MS (EI) m/z: 190 (5.3) (M+), 188 (18.1) (M+), 147 (13.5), 145 (47.2), 125 (100), 107 (22.6), 97 (52.8), 81 (89.1), 67 (36.2), 55 (61.1).

HRMS: found: 188.0974, C10H17ClO requires 188.0967.

**4a: 3-chloro-1,1-dicyclopropylpropan-1-ol**

1H NMR (CDCl3, 250 MHz):  3.79 (2H,t, *J* = 8 Hz); 2.08 (2H, t, *J* = 8 Hz), 1.01 (1H, s), 0.82 (2H, m); 0.38 (8H, m).

13C NMR (CDCl3, 63 MHz):  70.59, 45.18, 40.83, 18.68, 0.50, 0.32.

IR(cm-1): 3483, 3086, 3008, 1376, 1022.

MS (EI) m/z: 156 ( 0.4) (M+-18), 133 (12.8), 111 (100), 97 (12.4), 91 (21.2), 83 (32.1), 69 (63.4).

HRMS (M-H2O): found: 156.0708, C9H13Cl requires 156.0705.

**5e: 1-cycloheptylcyclopropanol**

1H NMR (CDCl3, 250 MHz):  1.68 (10H, m), 1.21 (2H, m), 0.93 (2H, m), 0.72 (2H, t, *J* = 5.6 Hz), 0.45 (2H, t, *J* = 5.6 Hz).

13C NMR (CDCl3, 63 MHz):  61.21, 47.28, 36.98, 28.11, 27.00, 13.68.

IR(cm-1): 3350, 2922, 2855, 1459, 1266, 1224, 1006.

MS (EI) m/z: 154 (14.1) (M+), 125 (100), 111 (61.2), 97 (54.6), 81 (63.7), 79 (26.6), 69 (24.9), 67 (24.7), 57 (60), 55 (65.8).

HRMS: found: 154.1356, C10H18CO requires 154.1357.

**7: 8-vinylbicyclo[5.1.0]oct-8-yl 4-methylbenzenesulfonate**

1H NMR (CDCl3, 250 MHz):  7.75 (2H, d, *J* = 8.3 Hz), 7.31 (2H, d, *J* = 8.3 Hz), 5.85 (1H, dd, *J1*  = 17.25 Hz, *J2* = 10.9 Hz), 5.46 (1H,dd, *J1*  = 17.2 Hz, *J2* = 1.4 Hz), 5.36 (1H, dd, *J1*  = 10.9 Hz, *J2*= 1.4 Hz), 2.43 (3H, s), 2.14-2.01 (2H, m), 1.9-0.9 (10H, m).

13C NMR (CDCl3, 63 MHz):  144.23, 135.72, 130.72, 129.47, 127.43, 119.79, 72.70, 32.41, 29.59, 29.10, 25.71, 21.48.

IR(cm-1): 2931, 2856, 1362, 1173.

HRMS (M+Na): found: 329.1183, C17H22NaO3S requires 329.1187.

**8: (1R,7S,8r)-8-aminobicyclo[5.1.0]octane-8-carboxylic acid**

1H NMR (D2O, 250 MHz):  1.7-1.51 (7H, m), 1.53-1.35 (3H, m), 1.34-1.14 (1H, m), 1.13-0.91 (4H, m).

13C NMR (D2O, 63 MHz):  176.41, 68.47, 34.26, 32.19, 31.11, 25.33.

IR(cm-1): 3401, 3173, 2927, 1708, 1659, 1402.

LRMS: 192 (M+Na).
